# Supplementary material for: Planar Covariation of Hindlimb and Forelimb Elevation Angles during Terrestrial and Aquatic Locomotion of Dogs
Source: PLoS One. 2015 Jul 28;10(7):e0133936. doi: 10.1371/journal.pone.0133936 (PMC4517757; doi:10.1371/journal.pone.0133936)
Supplement: S1 Dataset — S1_Dataset.zip contains two folders: 1) Files in the 'Dogs Data' folder are the kinematic data in Matlab format (.mat) for each subject and each gait; 2) Files in the 'comparison' folder are the data used for the validation of the markerless motion capture system. (ZIP) [file pone.0133936.s001.zip]

Archive with 11 entries (9 files):
- S1_DataSet/Dogs Data/
- S1_DataSet/Dogs Data/DogK.mat
- S1_DataSet/Dogs Data/DogS.mat
- S1_DataSet/Dogs Data/DogG.mat
- S1_DataSet/Dogs Data/DogA.mat
- S1_DataSet/Dogs Data/DogM.mat
- S1_DataSet/Dogs Data/DogR.mat
- S1_DataSet/readme.pdf
- S1_DataSet/comparison/
- S1_DataSet/comparison/DogS_fromvideo.mat
- S1_DataSet/comparison/DogS_fromSIMI.mat
